# Supplementary material for: Deep red MGe4O9:Mn4+(M = Sr, Ba) phosphors: structure, luminescence properties and application in warm white light emitting diodes
Source: Royal Society of Chemistry journal article supplement (doi:10.1039/c6tc01813k), 2016-01-01
Supplement: c6tc01813k1.pdf [file c6tc01813k1.pdf]

## Electronic Supplementary Information (ESI)

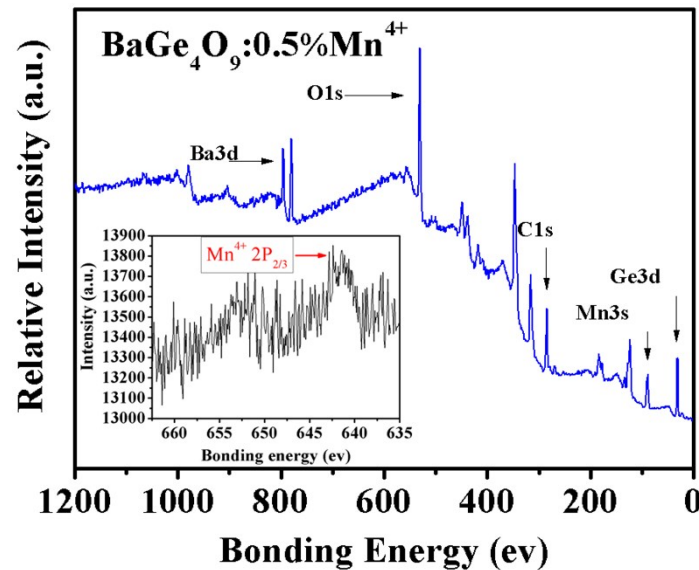

**Figure S1.** The high-resolution XPS spectra of sample  $\text{BGO}:0.5\%\text{Mn}^{4+}$ , the inset is  $\text{Mn } 2p$  XPS spectrum of  $\text{BGO}:0.5\%\text{Mn}^{4+}$  sample.
